# Supplementary material for: Dynamics of Cough Frequency in Adults Undergoing Treatment for Pulmonary Tuberculosis
Source: PubMed Central journal article supplement (PMC5399950; doi:10.1093/cid/cix039), 2017-01-25
Supplement: cix039_suppl_supplementary_03_01_17.pdf [file cix039_suppl_supplementary_03_01_17.pdf]

**Supplementary Equation 1:**

$$\log(\text{cough episodes/hour}) = b_j + \beta_0 + \beta_1 \sin\left(\frac{2\pi t}{24}\right) + \beta_2 \cos\left(\frac{2\pi t}{24}\right) + \beta_3 \text{treatment day} + \varepsilon_{ij}$$

In the equation above, j represents the participant, i represents the day of the recording, and t is the hour of the day.

**Supplementary Table 1: Recordings in All Enrolled Participants and in Study Group**

|                                              | All Enrolled         | Study Group          |
|----------------------------------------------|----------------------|----------------------|
| <b>Number of participants evaluated</b>      | 97                   | 66                   |
| <b>Total recordings</b>                      | 1642                 | 1122                 |
| <b>Recordings excluded from analysis (%)</b> | 685 (42%)            | 452 (40%)            |
| ... recording malfunction                    | 45                   | 36                   |
| ... recordings with high background noise    | 485                  | 308                  |
| ... MP3 to WAV conversion error              | 18                   | 14                   |
| ... recordings not checked by nurse          | 58                   | 38                   |
| ... recordings started after 24 hours        | 16                   | 10                   |
| ... recordings shorter than 1 hour           | 63                   | 46                   |
| <b>Participants with adequate recordings</b> | 94                   | 64                   |
| <b>Recordings contributing to analysis</b>   | 957 (936 total days) | 670 (661 total days) |
| <b>Hours contributing to analysis</b>        | 17,412               | 12,108               |

From the 97 enrolled participants in the parent study, there were 3 participants who did not have a single adequate recording during the study period due to high background noise. The 3 excluded comprised of 2 participants (recordings=4) who were drug-susceptible HIV-negative and 1 participant (recordings=4) who was TB-culture negative. Therefore, the number of participants with adequate recordings in all enrolled participants was 97% (94/97), and for the HIV-negative with culture-confirmed drug-susceptible pulmonary TB study group was also 97% (64/66).

**Supplementary Table 2: Cough, Culture, and Smear in Participants with Matched Samples in Study Group**

| Day of Treatment                                                     | Pre-tx | 3    | 7    | 14   | 21    | 30   | 60   |
|----------------------------------------------------------------------|--------|------|------|------|-------|------|------|
| <b>Number of participants evaluated</b>                              | 26     | 57   | 52   | 49   | 32    | 30   | 23   |
| <b>Participants with “no cough” (%)</b>                              | 12%    | 40%  | 37%  | 49%  | 66%   | 57%  | 65%  |
| <b>Participants with culture-positive samples (%)</b>                | 96%    | 86%  | 7.7% | 53%  | 47%   | 43%  | 0.0% |
| <b>Participants with culture-negative samples (%)</b>                | 0.0%   | 3.5% | 9.6% | 37%  | 28%   | 50%  | 96%  |
| <b>Participants with indeterminate culture samples (%)</b>           | 3.9%   | 11%  | 83%  | 10%  | 25%   | 6.7% | 4.4% |
| <b>Participants with smear negative samples (%)</b>                  | 27%    | 23%  | 37%  | 47%  | 56%   | 60%  | 87%  |
| <b>Participants with smear paucibacillary samples (%)</b>            | 7.7%   | 7.0% | 5.8% | 12%  | 9.4%  | 10%  | 4.4% |
| <b>Participants with smear + samples (%)</b>                         | 31%    | 21%  | 21%  | 25%  | 22%   | 20%  | 8.7% |
| <b>Participants with smear ++ samples (%)</b>                        | 3.9%   | 23%  | 23%  | 12%  | 13%   | 10%  | 0.0% |
| <b>Participants with smear +++ samples (%)</b>                       | 31%    | 26%  | 13%  | 4.0% | 0.0%  | 0.0% | 0.0% |
| <b>Median cough frequency in participants</b>                        | 2.3    | 0.83 | 0.66 | 0.43 | 0.088 | 0.24 | 0.18 |
| <b>Median cough frequency in culture-positive participants</b>       | 2.4    | 1.0  | 0.67 | 0.96 | 0.53  | 0.47 | -*   |
| <b>Cough &gt;0.7 in culture-positive participants (%)</b>            | 92%    | 63%  | 65%  | 65%  | 53%   | 62%  | -*   |
| <b>Median TTP in participants</b>                                    | 6.0    | 10   | 11   | 11   | 12    | 14   | -*   |
| <b>Median TTP in participants with “no cough”</b>                    | 5.5    | 9.5  | 12   | 13   | 14    | 17   | -*   |
| <b>Median TTP in participants with cough &gt;0.7</b>                 | 6.0    | 10   | 11   | 10   | 11    | 12   | -*   |
| <b>Median log<sub>10</sub>CFU in participants</b>                    | 4.1    | 3.5  | 3.3  | 3.3  | 3.2   | 2.9  | -*   |
| <b>Median log<sub>10</sub>CFU in participants with “no cough”</b>    | 4.2    | 3.6  | 3.2  | 3.0  | 2.9   | 2.4  | -*   |
| <b>Median log<sub>10</sub>CFU in participants with cough &gt;0.7</b> | 4.1    | 3.5  | 3.3  | 3.5  | 3.4   | 3.2  | -*   |

Only participants with both cough and sputum data on a given day were included. “No cough” was defined as  $\leq 0.7$  cough events per hour. Cough frequency is based on cough episodes per hour. Estimated-CFU counts over time, based on our equation  $\log_{10}\text{CFU} = 5.1 - (0.16 \times \text{TTP})$ , so only included positive cultures. No culture positive samples were found at day 60. -\* represents no observations. All values rounded to two significant figures.

**Supplementary Table 3: Correlation Between Short Recordings and 24-Hour Recordings in Study Group**

| Time Interval | Observation | Discovery Set (n = 178) |                        | Validation Set (n = 89) |      |
|---------------|-------------|-------------------------|------------------------|-------------------------|------|
|               |             | Window                  | Spearman's $\rho$ (se) | Spearman's $\rho$ (se)  | ICC  |
| 2 hours       | Best        | 2 p.m. – 4 p.m.         | 0.79 (0.05)            | 0.73 (0.07)             | 0.60 |
| 2 hours       | Worst       | 11 p.m. - 1 a.m.        | 0.44 (0.07)            | 0.35 (0.10)             | 0.14 |
| 4 hours       | Best        | 2 p.m. - 6 p.m.         | 0.86 (0.04)            | 0.86 (0.06)             | 0.67 |
| 4 hours       | Afternoon   | 12 p.m. - 4 p.m.        | 0.84 (0.04)            | 0.85 (0.06)             | 0.75 |
| 4 hours       | Morning     | 9 a.m. - 1 p.m.         | 0.77 (0.05)            | 0.83 (0.06)             | 0.66 |
| 4 hours       | Worst       | 10 p.m. - 2 a.m.        | 0.54 (0.06)            | 0.41 (0.10)             | 0.27 |
| 8 hours       | Best        | 12 p.m. - 8 p.m.        | 0.92 (0.03)            | 0.93 (0.04)             | 0.84 |
| 8 hours       | Working*    | 9 a.m. - 5 p.m.         | 0.89 (0.04)            | 0.91 (0.04)             | 0.84 |
| 8 hours       | Worst       | 10 p.m. - 6 a.m.        | 0.76 (0.05)            | 0.67 (0.08)             | 0.79 |
| 12 hours      | Best        | 11 a.m. - 11 p.m.       | 0.95 (0.02)            | 0.93 (0.04)             | 0.90 |
| 12 hours      | Worst       | 6 p.m. - 6 a.m.         | 0.88 (0.04)            | 0.83 (0.06)             | 0.86 |

Correlation (Spearman's rho and standard error) and intra-class correlation coefficient (ICC) between cough as recorded over 2-12 hour windows, versus 24-hour cough. All cough recordings that were complete to within 23.5 hours were included. Working\* represents standard working hours (9 a.m. – 5 p.m.).

**Supplementary Figure 1: Daytime and Nighttime Cough Frequency in Study Group**

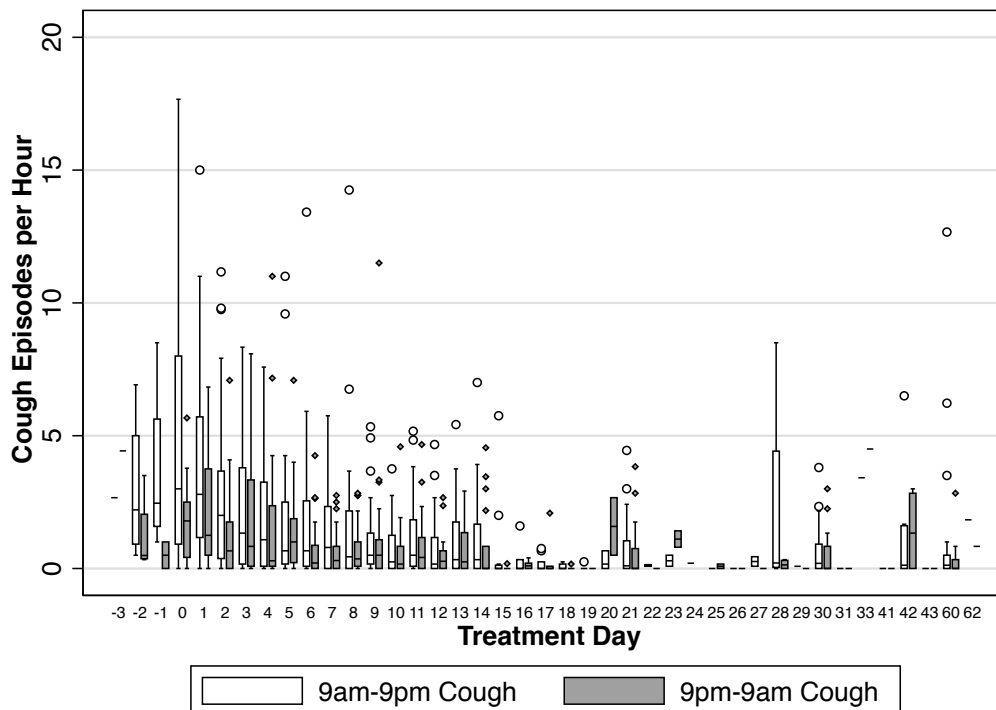

**Supplemental Figure 1** shows daytime and nighttime cough frequency based on 12-hour intervals (9 a.m. – 9 p.m. and 9 p.m. – 9 a.m.); from 3 days prior to treatment until treatment day 62 (study period).

**Supplementary Figure 2: Cough Frequency, Time to Positivity and Estimated-CFU by Days of Treatment in Study Group**

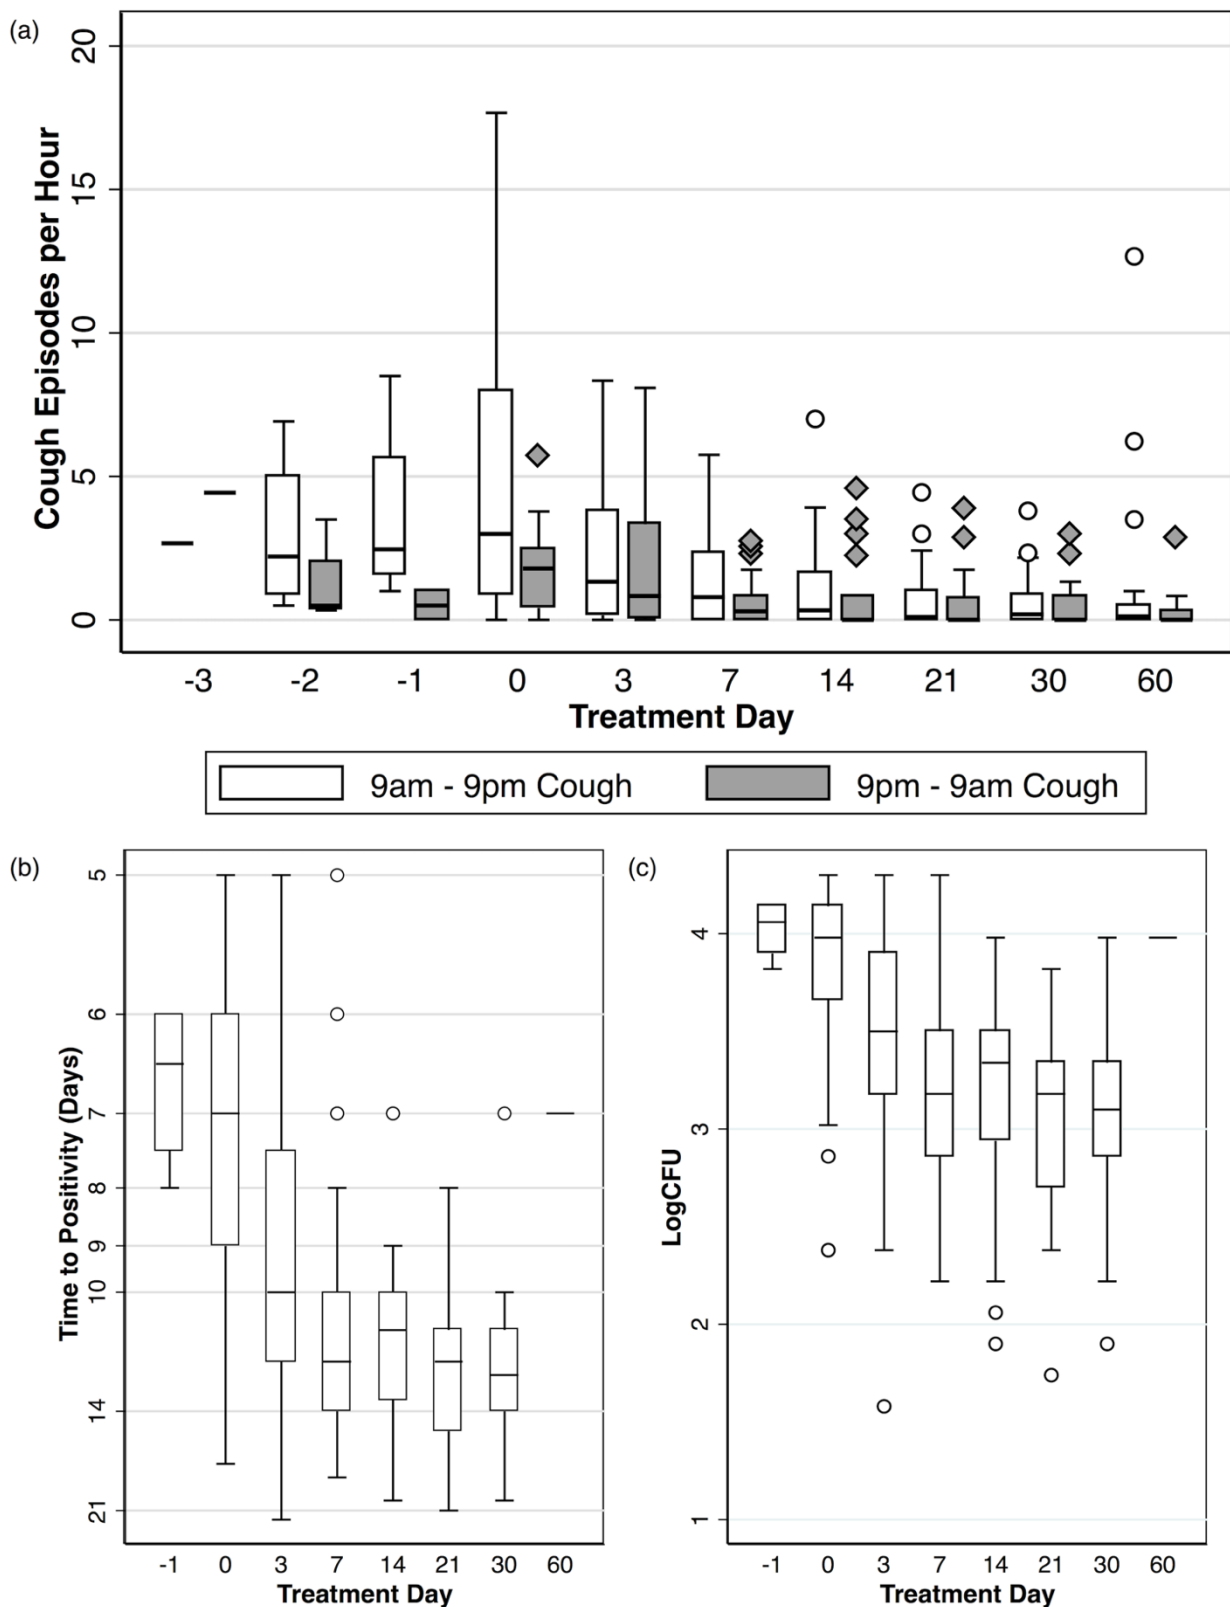

**Supplementary Figure 2(a)** shows daytime and nighttime cough frequency based on 12-hour intervals (9 a.m. – 9 p.m. and 9 p.m.–9 a.m.); this is only graphed for days on which sputum samples were collected.

**Supplementary Figure 2(b)** shows changes in time to positivity (TTP) at these same time points: the actual days to positivity are presented in an inverse scale (1/TTP). This represents longer time to positivity as treatment continues.

**Supplementary Figure 2(c)** shows estimated-CFU counts over time, based on our equation  $\log_{10}\text{CFU} = 5.1 - (0.16 \times \text{TTP})$ , so only included positive cultures.

**Supplementary Figure 3: Box Plot of Time to Positivity and Estimated-CFU by Smear Results in Pre-Treatment Samples from Study Group**

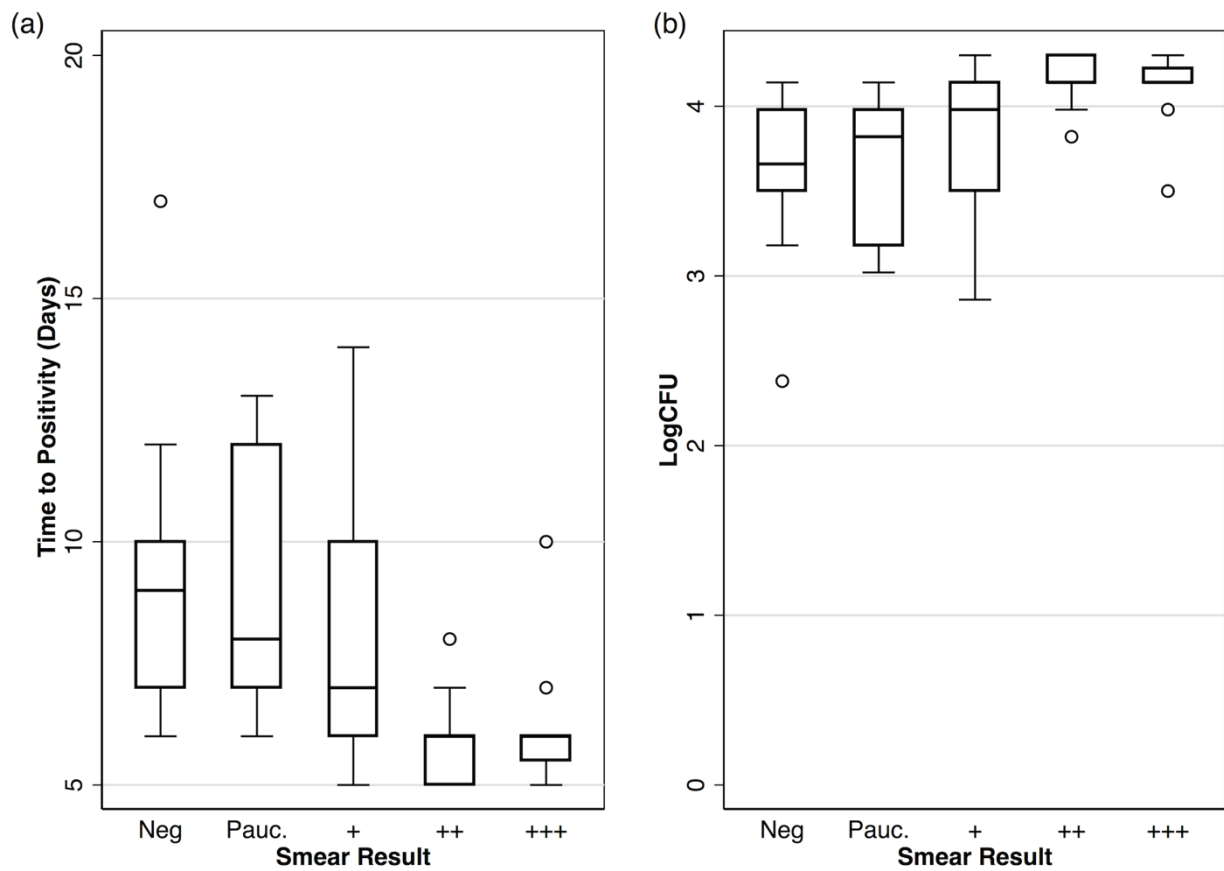

**Supplementary Figure 3(a)** shows a boxplot between time to positivity (TTP) by smear results in all culture-positive pre-treatment sputum samples. The correlation between TTP and smear had a Spearman rho of -0.53, and a  $p < 0.001$ . **Supplementary Figure 3(b)** shows a boxplot between estimated-CFU counts by smear results in all culture-positive pre-treatment sputum samples. Estimated-CFU counts were obtained by the equation  $\log_{10}\text{CFU} = 5.1 - (0.16 \times \text{TTP})$ . The correlation between estimated-CFU and smear had a Spearman rho of 0.53, and  $p < 0.001$ .
